# Supplementary material for: Cytokines Induced by Edwardsiella tarda: Profile and Role in Antibacterial Immunity
Source: MDPI journal article supplement (doi:10.3390/biom11081242), 2021-08-19
Supplement: s1 [file s1]

# Supplementary data

**Table S1.** The sequences of the siRNAs used for gene knockdown.

| siRNA              | Forward primer (5'-3') | Reverse primer (5'-3') | Target gene                       |
|--------------------|------------------------|------------------------|-----------------------------------|
| IL6si              | GGAUGCUACCAACUGGAUTT   | AUCCAGUUUGGUAGCAUCCTT  | Mouse IL6                         |
| PoTNF- $\alpha$ si | GGCCAUCCAUUUAGAAGGUTT  | ACCUUCUAAAUGGAUGGCCTT  | Japanese flounder PoTNF- $\alpha$ |
| NCsi               | UUCUCCGAACGUGUCACGUTT  | ACGUGACACGUUCGGAGAATT  | None                              |

**Table S2.** List of primers used for qRT-PCR.

| Gene name         | Organism                      | Forward primer (5'-3') | Reverse primer (5'-3') |
|-------------------|-------------------------------|------------------------|------------------------|
| IL27              | <i>Mus musculus</i>           | CTTCCAATGTTTCCCTGAC    | CGAAGTGTGGTAGCGAGGA    |
| IL6               | <i>Mus musculus</i>           | GGGAAATCGTGGAATGAGA    | AGGACTCTGGCTTTGTCTTTC  |
| iNOS              | <i>Mus musculus</i>           | GAGCAACTACTGCTGGTGGT   | CGATGTCATGAGCAAAGGCG   |
| TNF- $\alpha$     | <i>Mus musculus</i>           | GGACTAGCCAGGAGGGAGAA   | CGCGGATCATGCTTTCTGTG   |
| IL10              | <i>Mus musculus</i>           | TGGCCAGAAATCAAGGAGC    | CAGCAGACTCAATACACACT   |
| GAPDH             | <i>Mus musculus</i>           | ATTCAACGGCACAGTCAAGG   | GATGTTAGTGGGGTCTCGCTC  |
| PoTNF- $\alpha$   | <i>Paralichthys olivaceus</i> | TACAGCCAGGCGTCATTGAG   | GCCCAGGTAGATGGCATTGTA  |
| Po $\beta$ -actin | <i>Paralichthys olivaceus</i> | AACCGCTGCCTCTCTCAT     | TCGGGACAACGGAACCTCTC   |

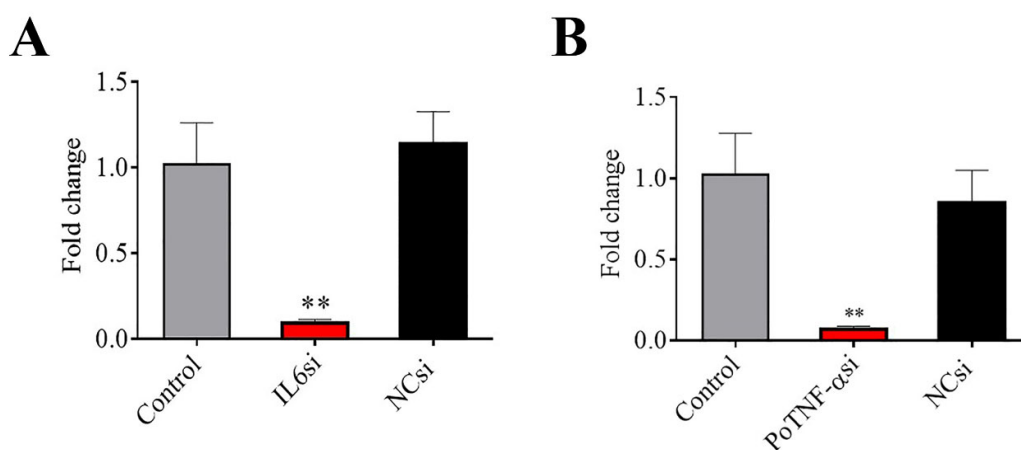

**Figure S1.** Verification of mouse IL6 (A) and Japanese flounder PoTNF- $\alpha$  (B) knockdown. (A) RAW264.7 cells were treated with or without (control) IL6si (a siRNA targeting IL6) or NCsi (negative control siRNA) for 24 h, and IL6 expression was determined by qRT-PCR. (B) Flounder FG-9307 cells were treated with or without (control) PoTNF- $\alpha$ si (a siRNA targeting PoTNF- $\alpha$ ) or NCsi for 24 h, and PoTNF- $\alpha$  expression was determined by qRT-PCR. Values are the means of triplicate experiments and shown as means  $\pm$  SD. \*\* $p < 0.01$ .

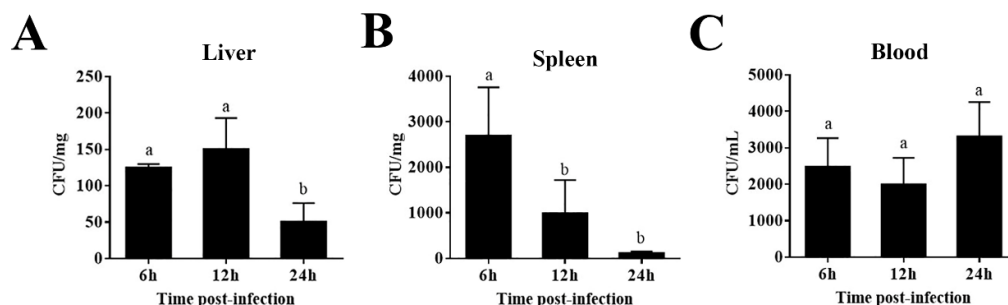

**Figure S2.** *Edwardsiella tarda* dissemination in mouse tissues. Mice were infected with *E. tarda* for different hours, and the bacterial numbers (Colony Forming Unit, CFU) in liver (A), spleen (B) and blood (C) were determined. Values are the means of three animals and shown as means  $\pm$  SD. Different letters indicate statistical significance.

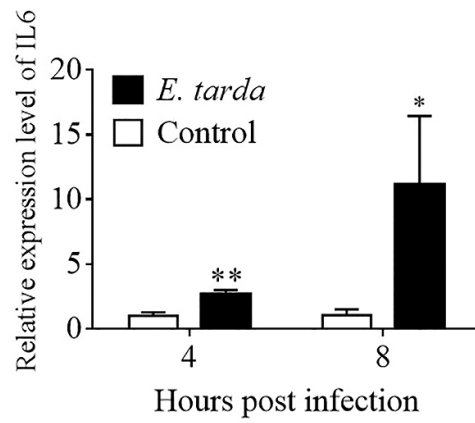

**Figure S3.** Expression of IL6 in *Edwardsiella tarda*-infected RAW264.7 cells. RAW264.7 cells were infected with or without (control) *E. tarda* for 1 h, and the extracellular bacteria were killed by antibiotic treatment. The cells were then incubated for 4 and 8 h, and IL6 expression was determined by qRT-PCR. Values are the means of triplicate experiments and shown as means  $\pm$  SD. \* $p < 0.05$ ; \*\* $p < 0.01$ .
